# Supplementary material
Source: PubMed Central journal article supplement (PMC1887562)

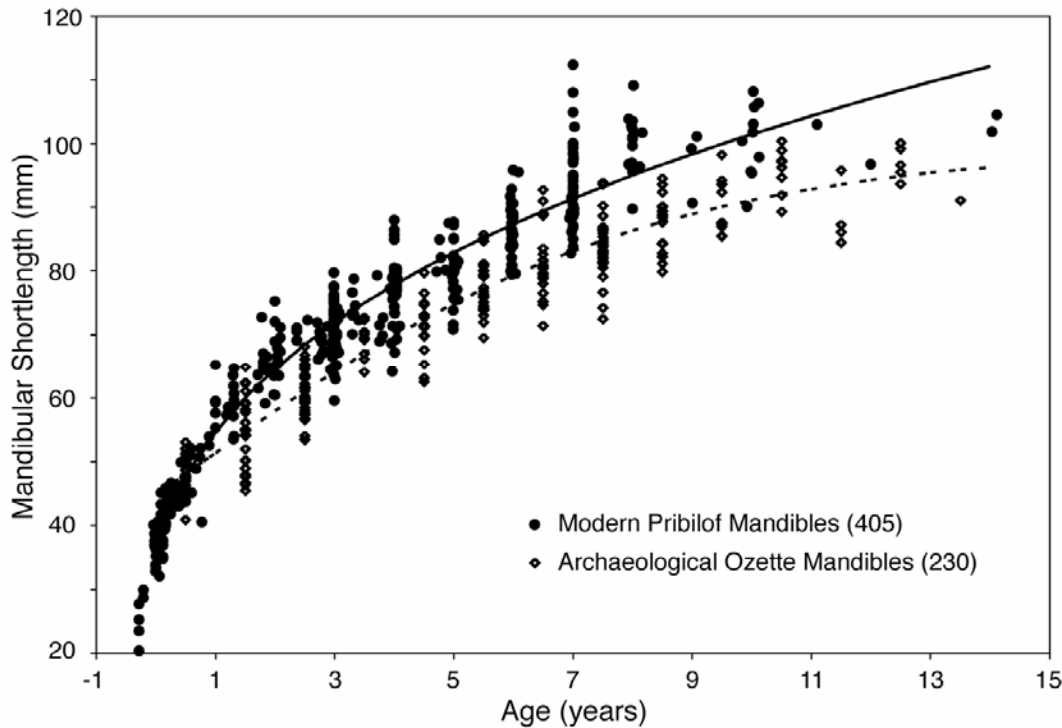

Supplement: pnas_0610986104_1.pdf [file pnas_0610986104_1.pdf]

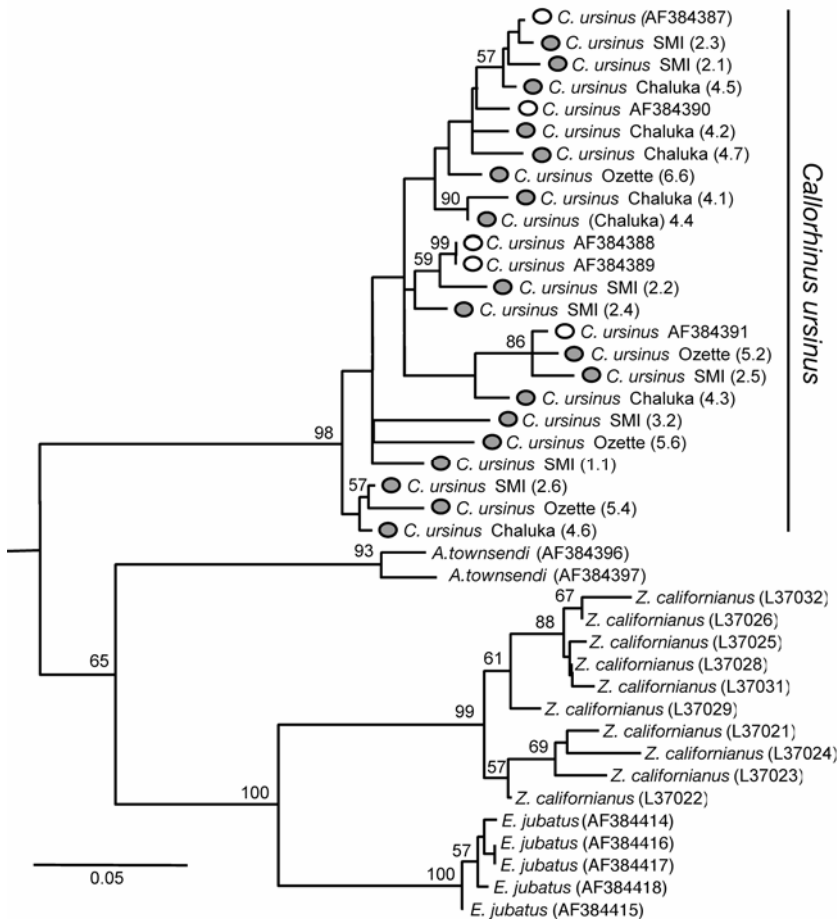

Supplement: pnas_0610986104_2.pdf [file pnas_0610986104_2.pdf]
